# Supplementary material for: Synthesis of single-walled carbon nanotubes on graphene layers
Source: Royal Society of Chemistry journal article supplement (doi:10.1039/c5cc02208h), 2015-01-01
Supplement: c5cc02208h1.pdf [file c5cc02208h1.pdf]

## SUPPLEMENTARY INFORMATION

# Synthesis of Single-Walled Carbon Nanotubes on Graphene Layers

Ranajit Ghosh,<sup>\*ab</sup> Takahiro Maruyama,<sup>\*a</sup> Hiroki Kondo,<sup>c</sup> Koji Kimoto,<sup>d</sup> Takuro Nagai,<sup>d</sup> and Sumio Iijima<sup>e</sup>

<sup>a</sup>Department of Applied Chemistry, Meijo University, Nagoya 468-8502, Japan; Email: ghosh.ranajit@gmail.com

<sup>b</sup>CSIR-Central Mechanical Engineering Research Institute, Durgapur-713209, West Bengal, India

<sup>c</sup>Department of Materials Science and Engineering, Meijo University, Nagoya 468-8502, Japan; Email: takamaru@meijo-u.ac.jp

<sup>d</sup>National Institute for Materials Science, Tsukuba, Ibaraki 305-0044, Japan

<sup>e</sup>Faculty of Science and Technology, Meijo University, Nagoya 468-8502, Japan

\*Address correspondence to: ghosh.ranajit@gmail.com, takamaru@meijo-u.ac.jp

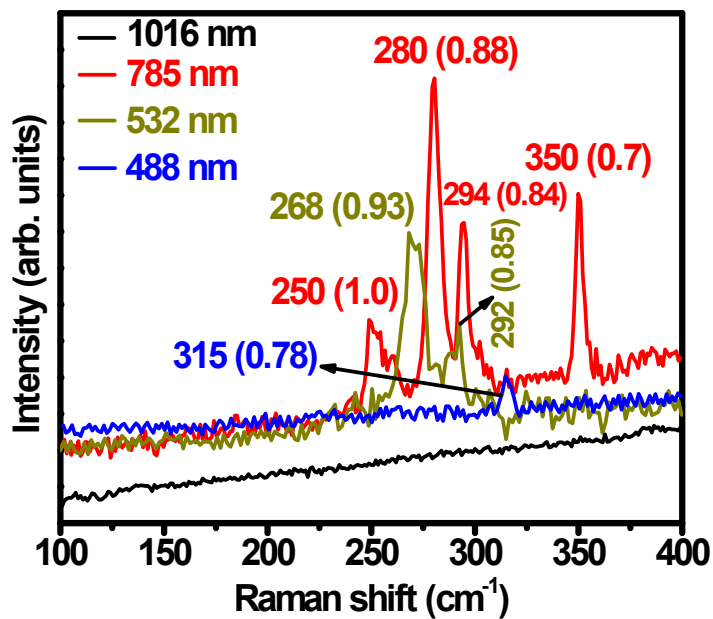

**Fig. S1** Raman spectra of as-synthesized SWCNTs on graphene layers using excitation wavelengths of 1016, 785, 532 and 488 nm. SWCNTs were grown by CVD using an alcohol gas source under a pressure of  $1 \times 10^{-4}$  Pa at 700 °C for 1 h. The diameters corresponding to RBM peaks are indicated in parentheses. Diameters were estimated using the formula  $d_t = 248/\omega_{\text{RBM}}$ , where  $d_t$  is the SWCNT diameter in nm and  $\omega_{\text{RBM}}$  is the frequency in  $\text{cm}^{-1}$  of the RBM.

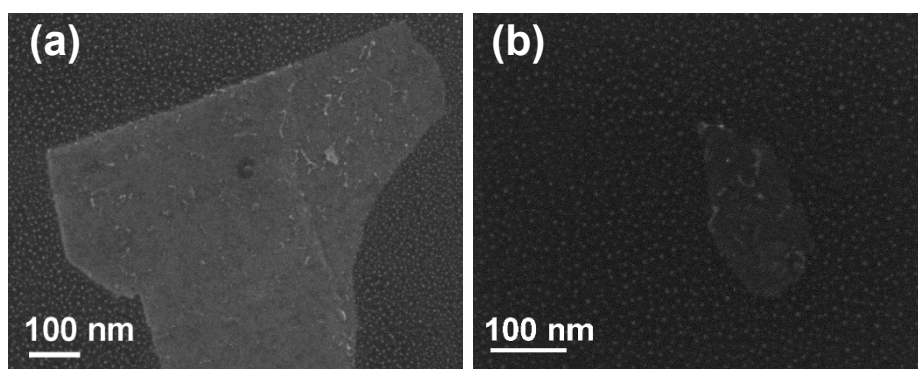

**Fig. S2** FESEM images of SWCNTs grown on graphene layers by CVD under different ethanol gas source pressures of (a)  $1 \times 10^{-3}$  Pa and (b)  $1 \times 10^{-5}$  Pa. The thickness of Pt was 0.2 nm in both experiments. Compared with that of SWCNTs grown using an ethanol gas pressure of  $1 \times 10^{-4}$  Pa (Fig. 1d in the main text), the densities of SWCNTs in (a) and (b) are lower.

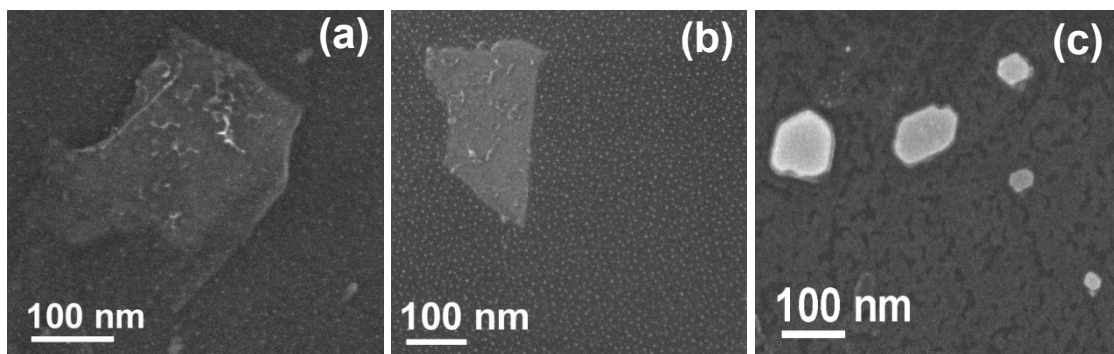

**Fig. S3** FESEM images of samples grown using different Pt thicknesses. (a) and (b) SWCNTs (density of about  $20/\mu\text{m}^2$ ) grown on graphene layers coated with 0.05 and 0.1 nm of Pt, respectively. (c), SWCNTs did not grow on graphene coated with 0.3 nm of Pt. This is because the Pt particles aggregated to form large hexagonal Pt crystals (white), thus revealing the limit of Pt thickness to grow SWCNTs on graphene.

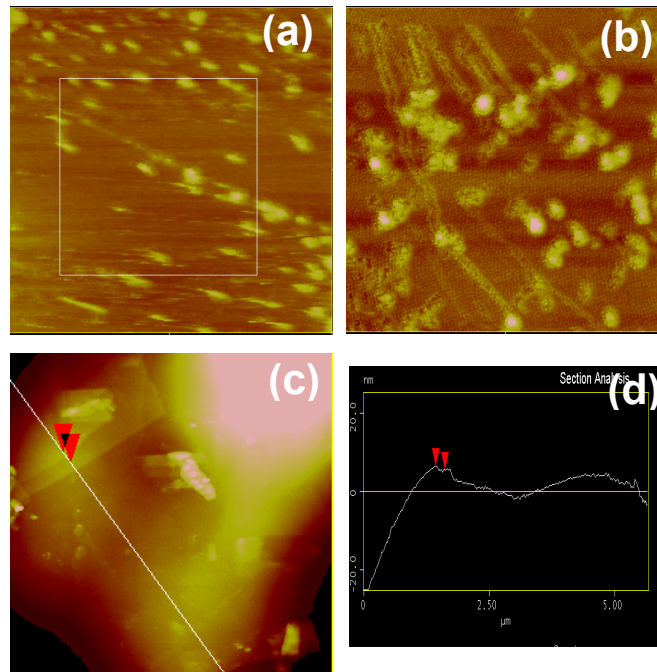

**Fig. S4** AFM images of (a) pristine graphite (250×250 nm), (b) chemically treated graphite (250×250 nm), and (c) chemically treated graphene exists on the graphite surface (5×5 μm). RMS roughnesses of the areas shown in (a) and (b) were 0.45 and 0.71 nm, respectively. (d) The height profile for the line in (c) shows that the height difference between the two arrows (edges of graphene layers) is 0.82 nm.

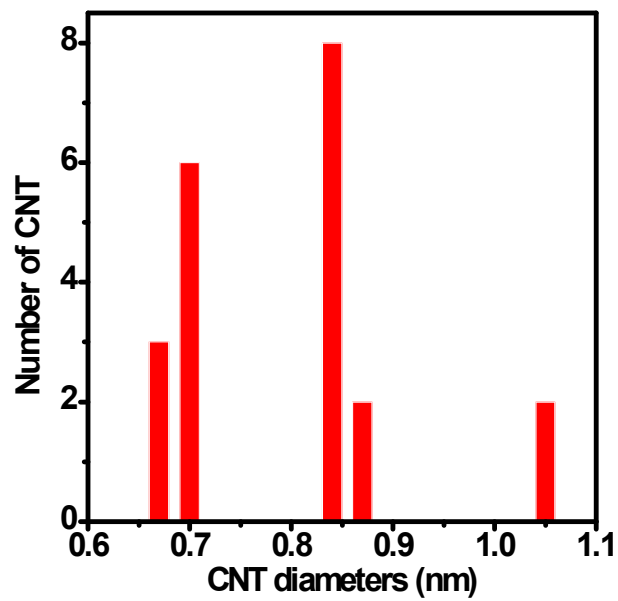

**Fig. S5** Histogram showing a diameter distribution of SWCNTs grown on the graphene layers, indicating SWCNTs with a small diameter grown on graphene layers.
